# Supplementary material for: Synthesis, structures, DFT calculations, and catalytic application in the direct arylation of five-membered heteroarenes with aryl bromides of novel palladium-N-heterocyclic carbene PEPPSI-type complexes
Source: Royal Society of Chemistry journal article supplement (doi:10.1039/d1nj03388c), 2021-01-01
Supplement: d1nj03388c1.pdf [file d1nj03388c1.pdf]

## Supplementary Material

for

### **Synthesis, structures, DFT calculations, and catalytic application in the direct arylation of five-membered heteroarenes with aryl bromides of novel Palladium-*N*-Heterocyclic carbene complexes PEPPSI-Type**

**Abd el-Krim Sandeli,<sup>a,d</sup> Naima Khiri-Meribout,<sup>a,b\*</sup> Saida Benzerka,<sup>a,b</sup> Housseem Boulebd,<sup>a,b</sup> Nevin Gürbüz,<sup>c,d</sup> Namık Özdemir,<sup>e</sup> and İsmail Özdemir<sup>c,d\*</sup>**

*<sup>a</sup>Research Laboratory of Synthesis of Molecules with Biological Interest, Mentouri Constantine-1 University, CONSTANTINE, ALGERIA*

*<sup>b</sup>Faculty of Science, Department of Chemistry, Mentouri Constantine-1 University, CONSTANTINE, ALGERIA*

*<sup>c</sup>Faculty of Science and Art, Department of Chemistry, İnönü University, MALATYA, TURKEY*

*<sup>d</sup>Catalysis Research and Application Center, İnönü University, 44280 MALATYA, TURKEY*

*<sup>e</sup>Department of Mathematics and Science Education, Faculty of Education, Ondokuz Mayıs University, 55139 SAMSUN, TURKEY*

## Content

|                                                                              | <b>Page</b> |
|------------------------------------------------------------------------------|-------------|
| <b>Figure 1.</b> $^1\text{H}$ and $^{13}\text{C}$ NMR spectrums of <b>3a</b> | 2           |
| <b>Figure 3.</b> $^1\text{H}$ and $^{13}\text{C}$ NMR spectrums of <b>3b</b> | 3           |
| <b>Figure 5.</b> $^1\text{H}$ and $^{13}\text{C}$ NMR spectrums of <b>3c</b> | 4           |
| <b>Figure 7.</b> $^1\text{H}$ and $^{13}\text{C}$ NMR spectrums of <b>3d</b> | 5           |
| <b>Figure 9.</b> $^1\text{H}$ and $^{13}\text{C}$ NMR spectrums of <b>3e</b> | 6           |

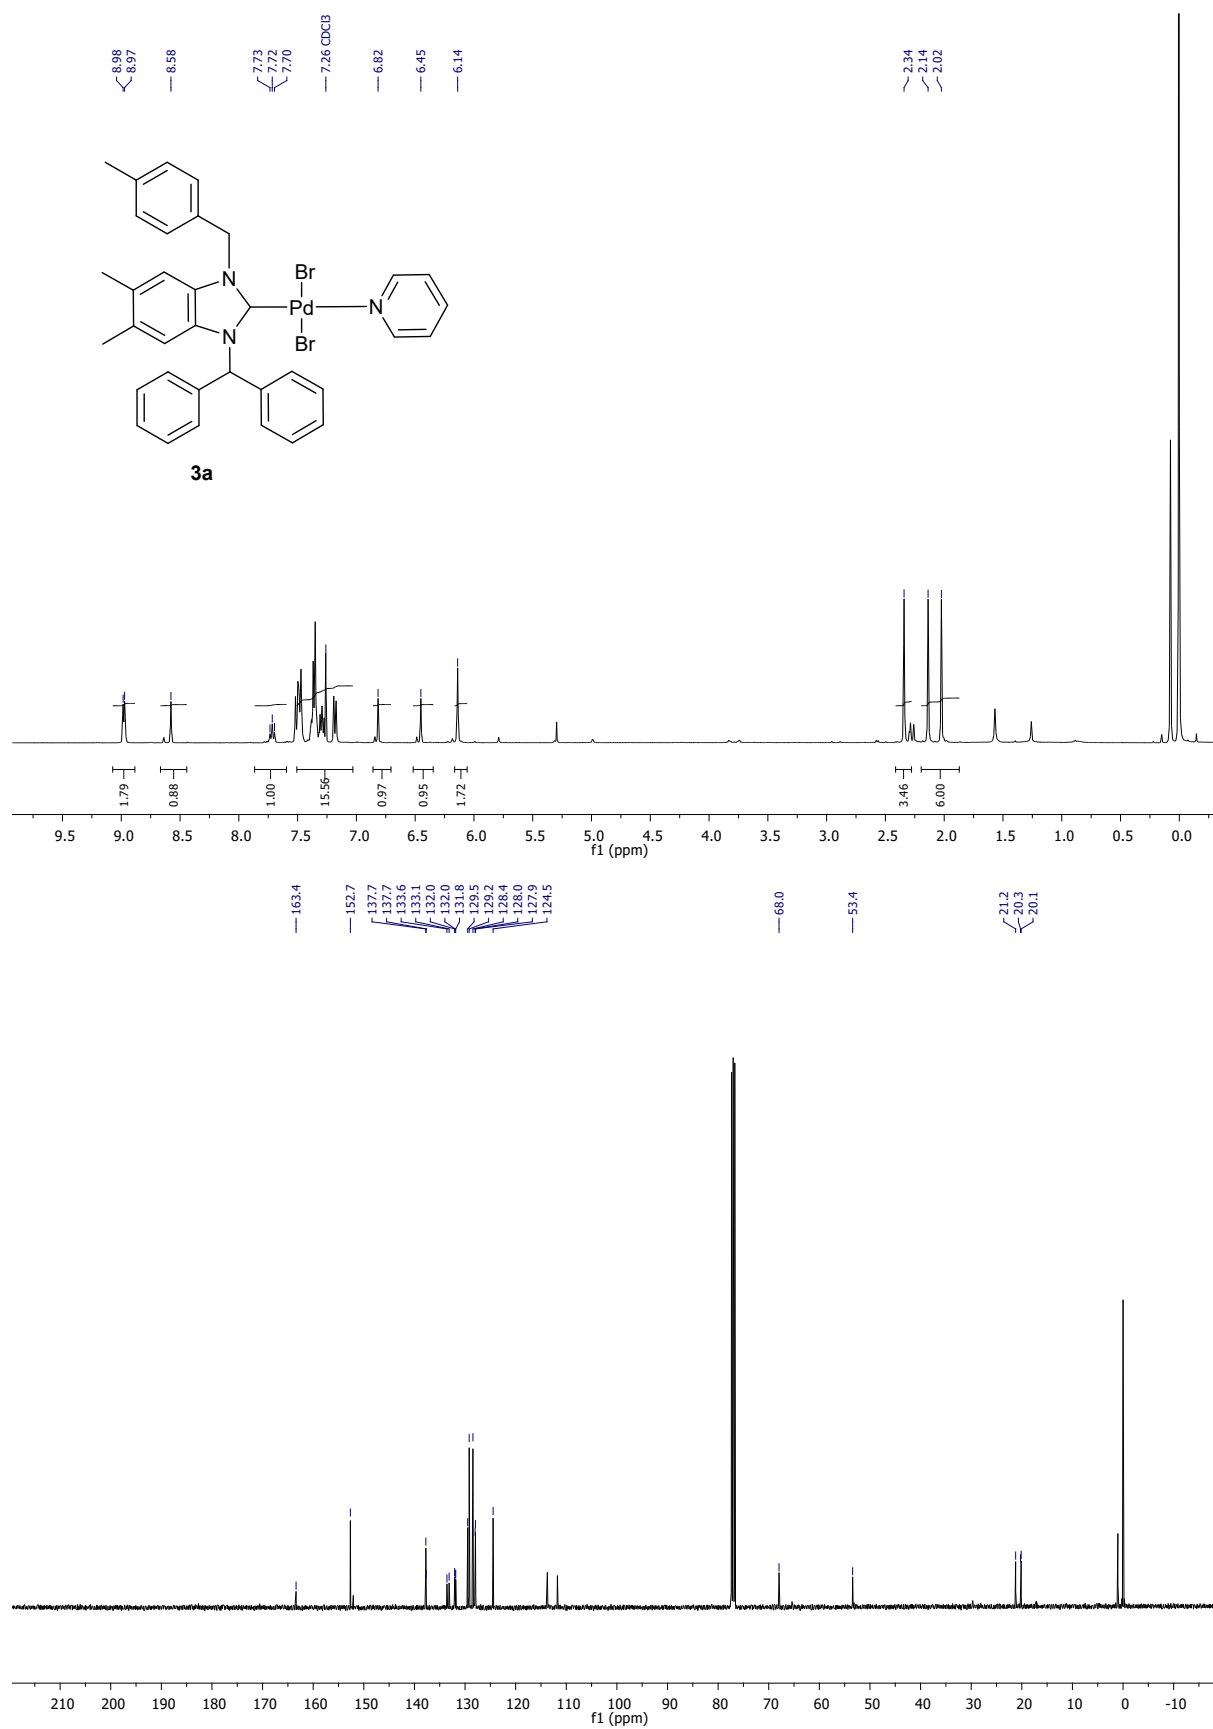

Figure 1. <sup>1</sup>H and <sup>13</sup>C NMR spectra of **3a**

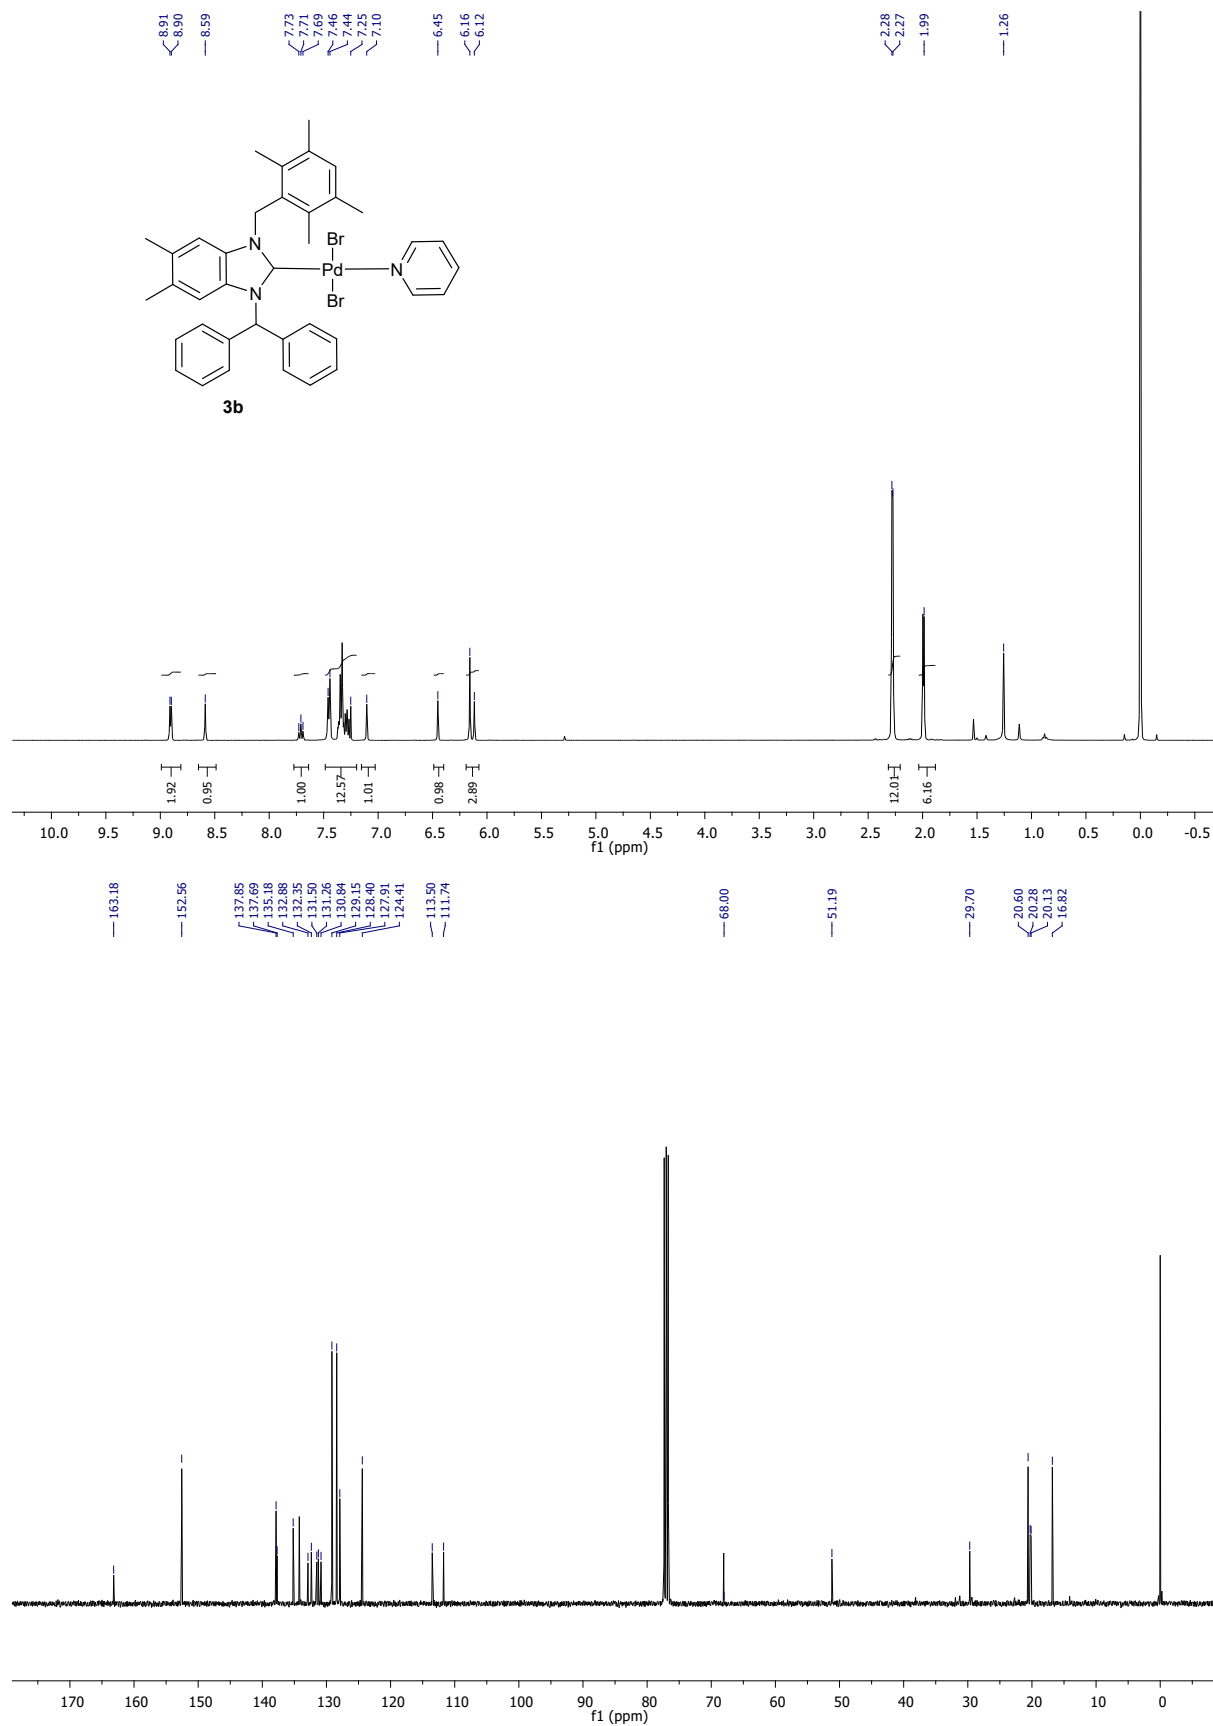

**Figure 2.** <sup>1</sup>H and <sup>13</sup>C NMR spectrums of **1b**

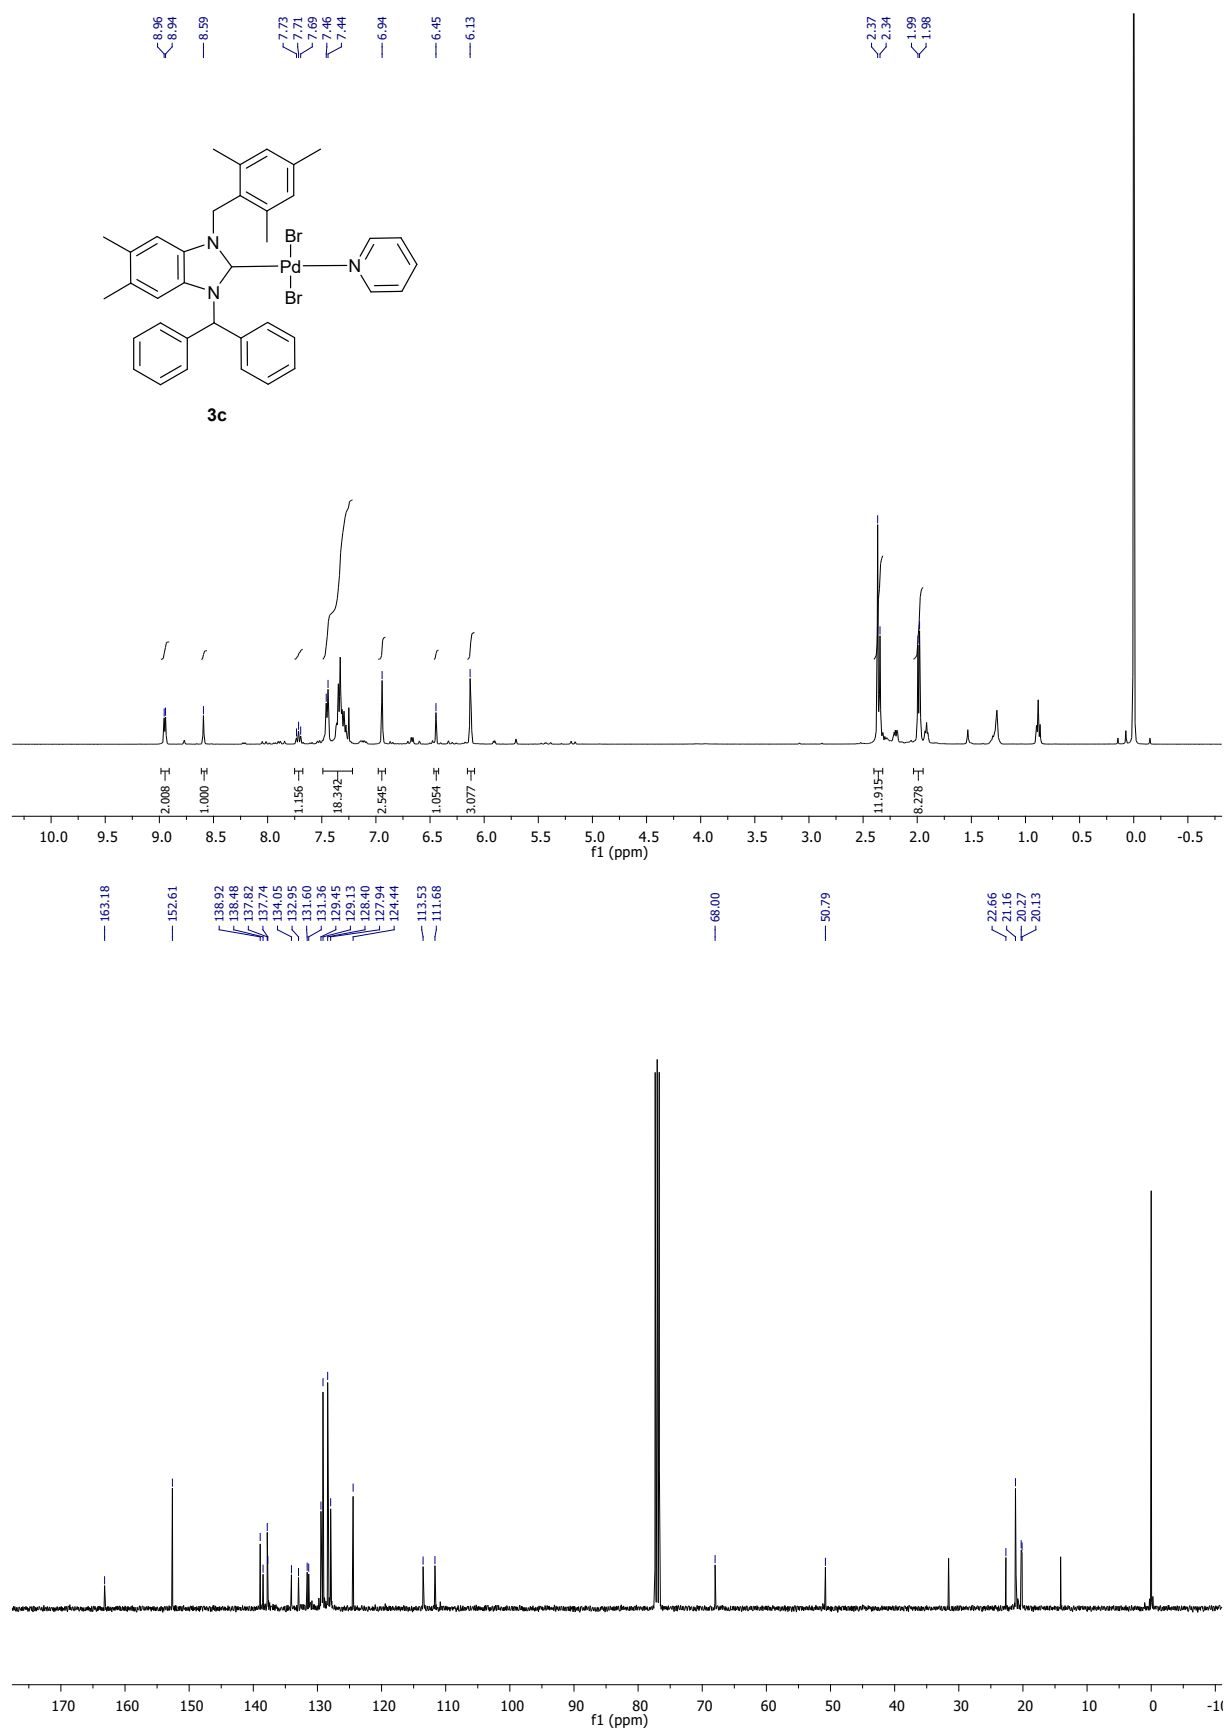

**Figure 3.** <sup>1</sup>H and <sup>13</sup>C NMR spectra of **3c**

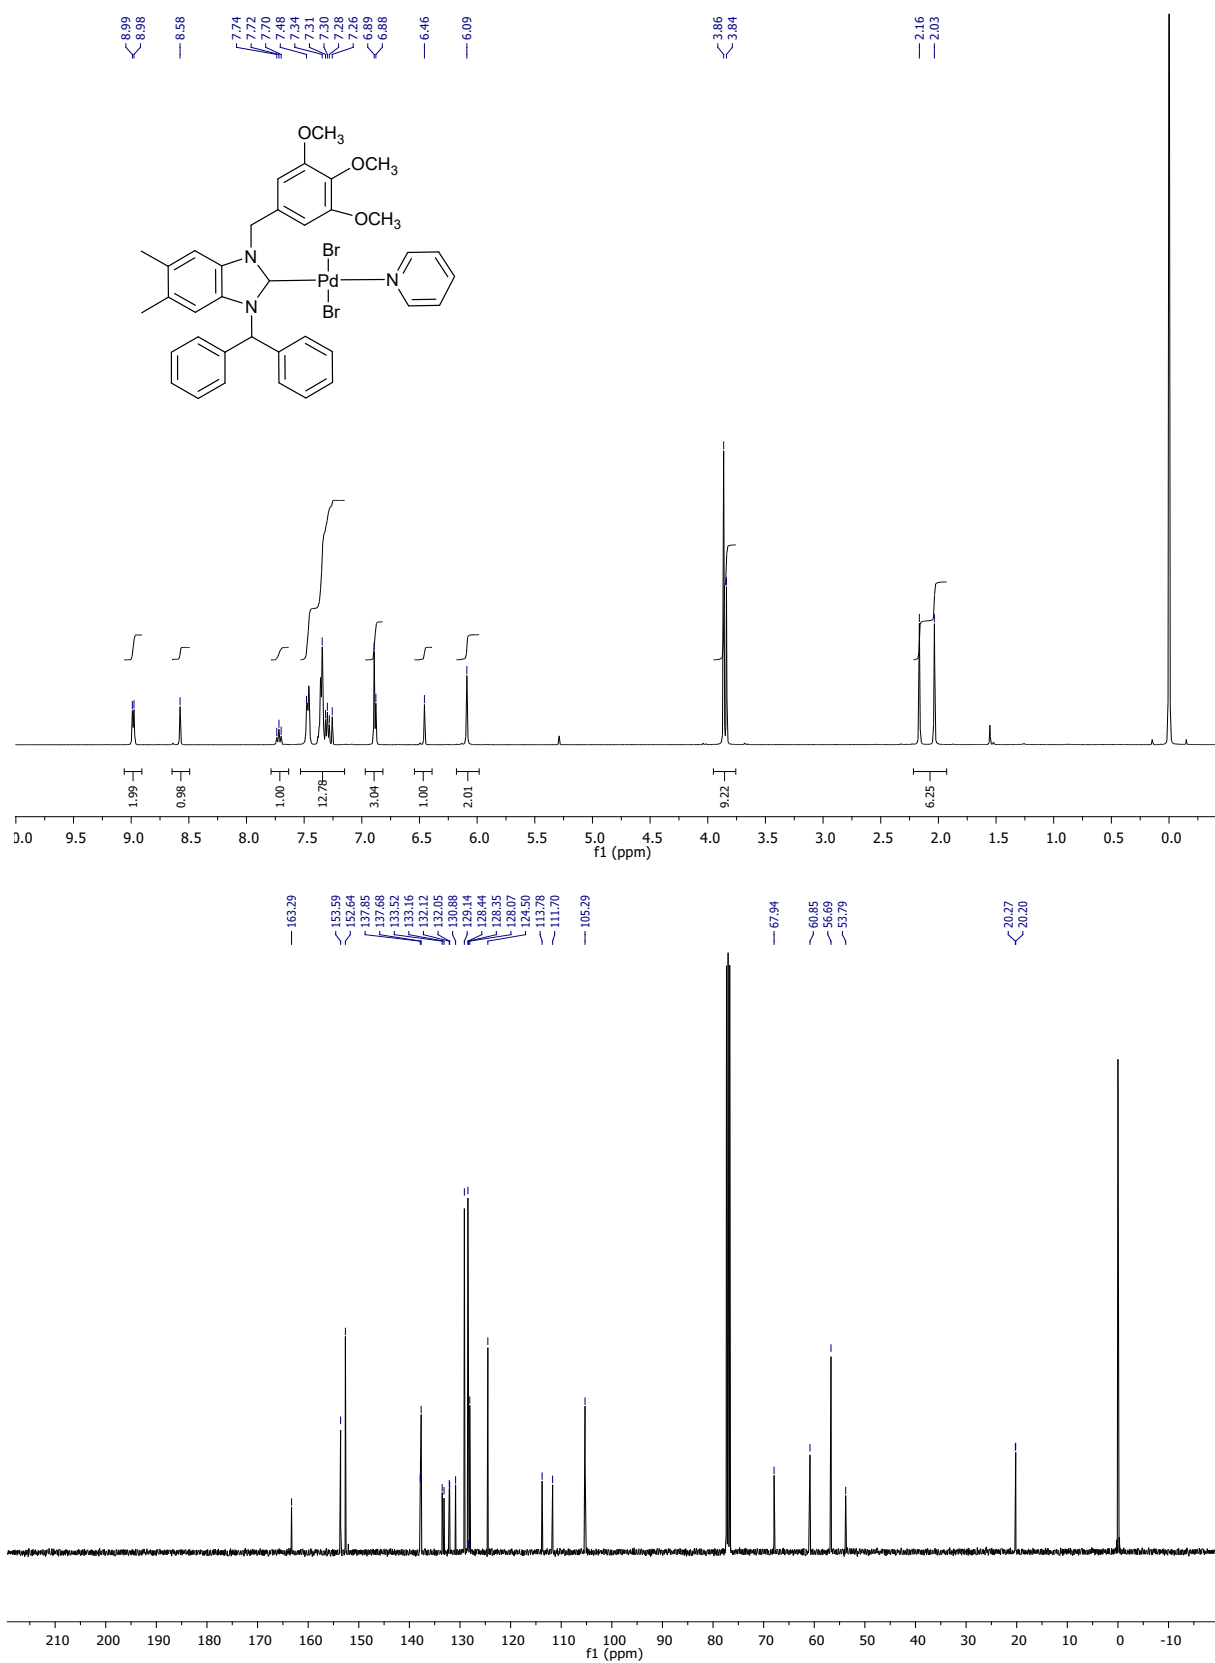

**Figure 4.** <sup>1</sup>H and <sup>13</sup>C NMR spectra of **3d**

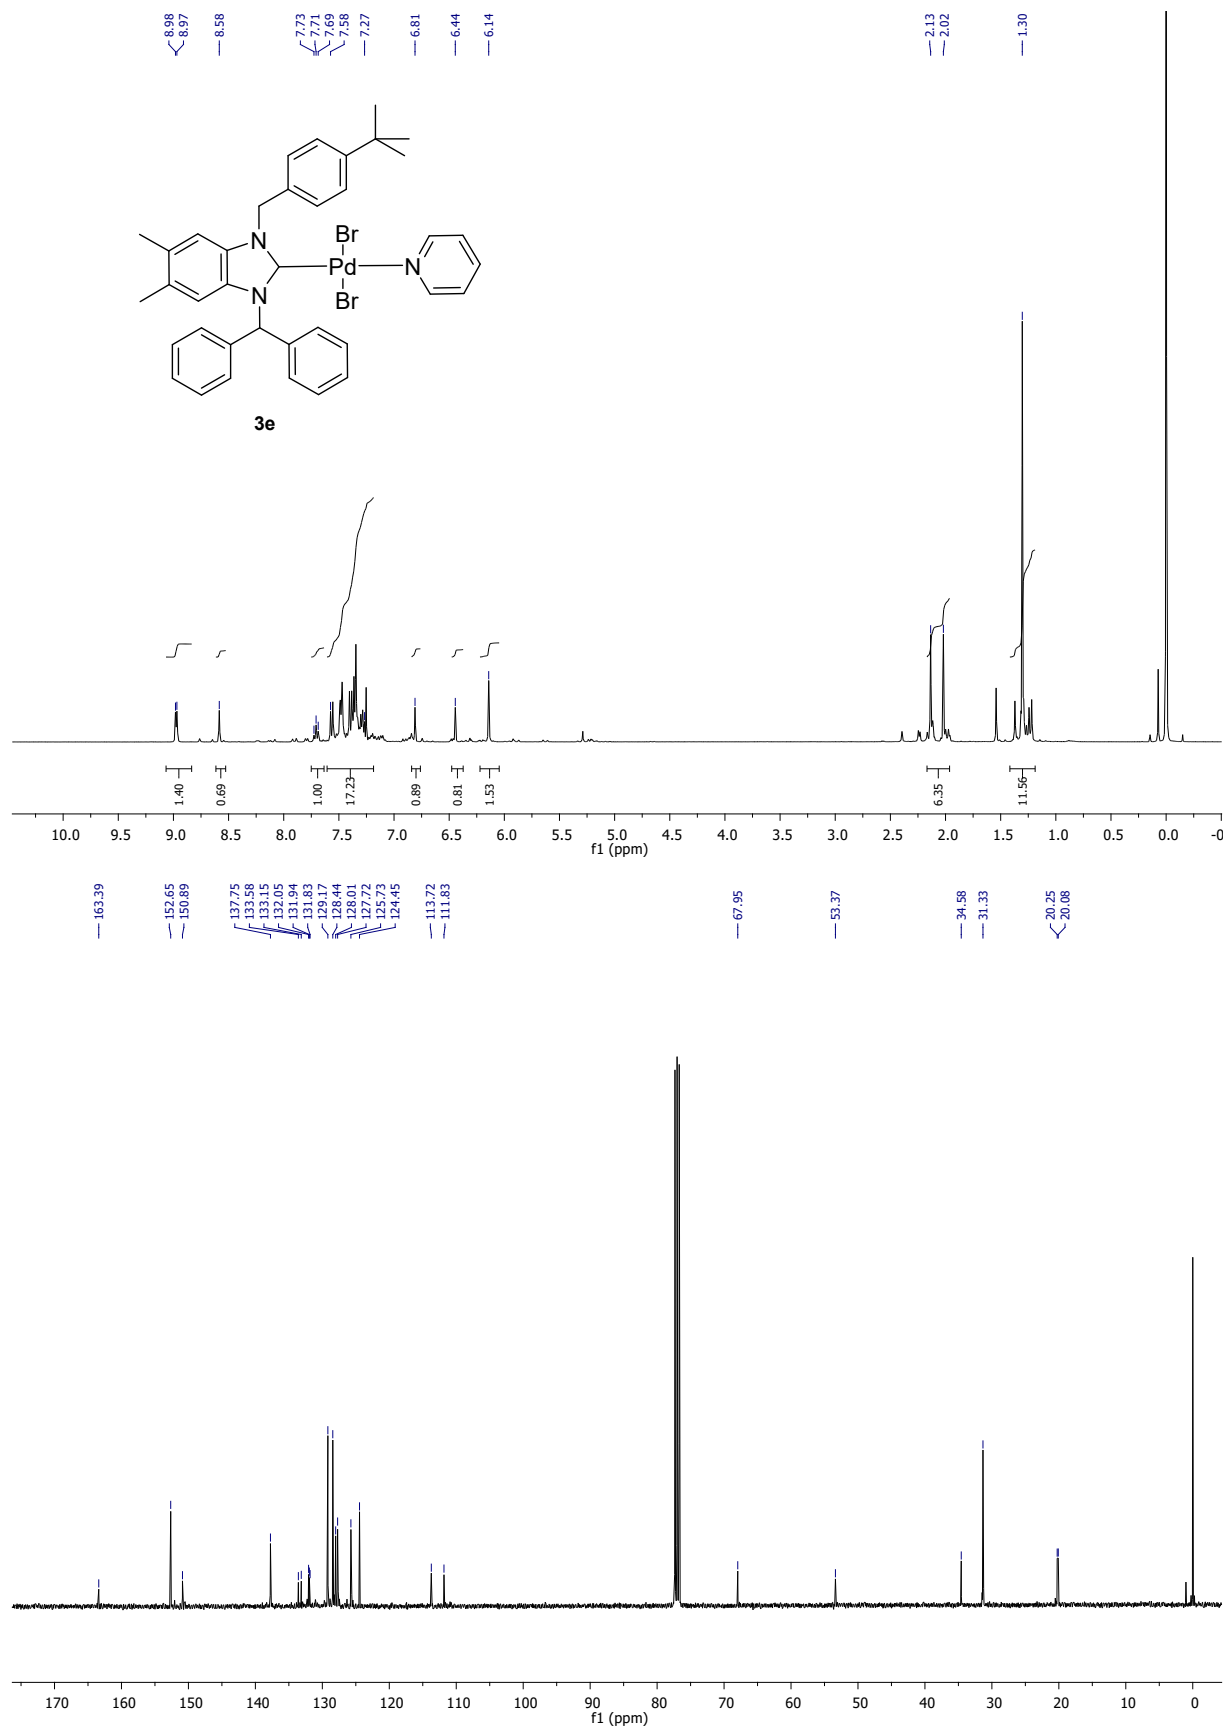

**Figure 5.**  $^1\text{H}$  and  $^{13}\text{C}$  NMR spectrums of **3e**.
